# Supplementary material for: The impact of coronavirus disease 2019 on frozen-thawed embryo transfer outcomes
Source: PeerJ. 2024 Sep 26;12:e18112. doi: 10.7717/peerj.18112 (PMC11439401; doi:10.7717/peerj.18112)
Supplement: Supplemental Information 1 [file peerj-12-18112-s001.xls]

## Sheet: 2023
序号	统计日期	O_ID	code	group	age at ET	opu-age	Endometrial preparation	Infertility duration (years)	Body mass index	Infertility cause	Endometrial thickness (mm)	No. embryos transferred	Embryo developmental stage	good-quality embryo	Embryo implantation	bio	clinial	abnormal	persistent	abortion	Number of COVID-19 symptoms(n)	Number of COVID-19 symptoms(n)	Duration of the symptoms(d)	Days from COVID-19 infected to transfer	Changes in menstrual pattern	fever	cough	cought	Sore throat	Running nose	headache	dizzy	Body pain	chest distress	fatigue	Shortness of breath	Nausea and vomiting	Abdominal pain	diarrhea	constipation	Decreased sense of smell and taste	hypomnesia	irritability	anxiety	insomnia
1	2023-02-13	65267	1	1	29	29	1	2	20.9	1	12	1	2	1	1	1	1		1	0	10	3=≥7	4	1=≤2 months	1=yes	1	1	1	1	1	0	0	1	0	1	0	0	0	0	0	1	0	0	0	1
2	2023-03-02	65913	2	1	26	26	2	6	23.2	2	9.9	1	1	1		0	0		0	0	4	2=4~6	1	2=>2 months	1=no	0	1	0	0	0	0	1	1	0	0	0	0	0	0	0	0	0	0	0	1
3	2023-03-02	65914	3	1	31	31	2	2	20.3	1	8.7	1	1	1		1	1		1	0	2	1=1~3	5	2	0	1	1	0	0	0	0	0	0	0	0	0	0	0	0	0	0	0	0	0	0
5	2023-03-02	65918	4	1	29	29	1	4	20.8	4	8.4	2	1	2		1	1		1	0	5	2	4	2	1	1	1	1	0	1	1	0	0	0	0	0	0	0	0	0	0	0	0	0	1
6	2023-03-03	65921	5	1	39	39	1	3	19.8	1	7.7	2	1	0		0	0		0	0	2	1	2	2	1	1	0	0	1	0	0	0	0	0	0	0	0	0	0	0	0	0	0	0	0
9	2023-03-03	65925	6	1	30	29	2	1	27	1	7.7	2	1	2		1	1		1	0	6	2	2	2	1	1	0	0	1	0	1	1	1	0	0	0	0	0	0	0	1	0	0	0	0
12	2023-03-04	65928	7	1	31	31	1	3	25.1	1	8.9	1	1	1		0	0		0	0	3	1	2	2	1	1	0	0	0	0	0	0	1	0	0	0	0	0	0	0	1	0	0	0	0
14	2023-03-03	65932	8	1	27	27	2	4	26.4	2	7.7	1	1	1		0	0		0	0	5	2	5	2	0	1	0	1	1	0	0	0	1	0	0	0	0	0	1	0	0	0	0	0	0
15	2023-03-03	65933	9	1	33	33	2	6	22.8	2	8.9	1	1	1		1	1		0	1	4	2	3	2	0	1	1	0	0	0	0	0	0	0	1	0	1	0	0	0	0	0	0	0	0
19	2023-03-04	65939	10	1	35	32	1	4	21.2	1	6.6	2	1	1		0	0		0	0	6	2	3	1	1	1	1	0	0	1	1	0	1	0	0	0	0	0	0	0	1	0	0	0	0
20	2023-03-05	65950	11	1	33	32	1	5	26.6	2	8.9	1	1	1		1	1		1	0	2	1	1	2	0	1	0	0	0	0	0	0	0	0	0	0	0	0	0	0	1	0	0	0	0
21	2023-03-05	65951	12	1	35	35	1	6	23	1	7.5	2	1	0		1	1		1	0	4	2	1	2	1	1	0	0	0	0	1	0	0	0	0	0	1	0	0	0	1	0	0	0	0
22	2023-03-04	65952	13	1	33	33	1	5	19.3	3	8.8	1	1	1		0	0		0	0	6	2	3	2	1	1	1	1	1	1	0	0	0	0	0	0	0	0	0	0	0	0	0	0	1
23	2023-03-04	65953	14	1	31	30	1	2	20.4	3	9.4	2	1	2		0	0		0	0	8	3	2	2	1	1	1	0	0	0	1	1	1	0	0	0	0	0	0	0	1	1	0	1	0
25	2023-03-04	65955	15	1	33	33	2	3	21.3	1	9.6	1	1	1		0	0		0	0	3	1	1	2	1	1	1	0	0	0	0	0	1	0	0	0	0	0	0	0	0	0	0	0	0
27	2023-03-05	65958	16	1	35	35	1	2	26.4	1	10.1	2	1	0		0	0		0	0	10	3	5	2	1	1	1	1	1	1	1	1	1	0	0	0	0	0	1	0	1	0	0	0	0
29	2023-02-15	65662	17	1	35	35	1	7	41.7	4	9	2	1	2		0	0		0	0	5	2	5	2	0	0	0	0	0	0	0	0	0	0	0	0	0	0	0	0	0	0	0	0	0
30	2023-02-15	65663	18	1	32	32	1	1	20	4	9	2	1	0	1	1	1		1	0	6	2	2	1	0	0	0	0	0	0	0	0	0	0	0	0	0	0	0	0	0	0	0	0	0
32	2023-02-15	65665	19	1	28	27	1	2	21	1	8.1	2	1	2	2	1	1		1	0	5	2	3	1	0	0	0	0	0	0	0	0	0	0	0	0	0	0	0	0	0	0	0	0	0
33	2023-02-16	65666	20	1	33	33	1	3	19.5	3	9	1	1	1	1	1	1		1	0	5	2	5	2	1	1	0	0	0	0	0	1	1	0	1	0	0	0	1	0	0	0	0	0	0
34	2023-02-16	65669	21	1	29	29	1	5	22.5	1	9.3	1	1	1	1	1	1		1	0	5	2	1	1	0	1	1	1	0	0	1	0	0	0	1	0	0	0	0	0	0	0	0	0	0
35	2023-02-16	65671	22	1	33	33	1	4	17.3	1	8.7	1	1	0		0	0		0	0	5	2	3	1	0	1	1	1	1	0	1	0	0	0	0	0	0	0	0	0	0	0	0	0	0
37	2023-02-16	65673	23	1	36	36	1	5	19.6	1	9.7	2	1	2	2	1	1		1	0	3	1	2	1	0	0	1	1	0	0	0	0	0	0	0	0	0	0	0	0	1	0	0	0	0
40	2023-02-17	65679	24	1	37	36	1	4	23.3	1	8.6	2	1	2	1	1	1		1	0	3	1	1	1	0	1	1	0	0	0	0	0	1	0	0	0	0	0	0	0	0	0	0	0	0
42	2023-02-16	65681	25	1	28	28	2	5	23.1	2	12.5	1	1	1		0	0		0	0	1	1	1	1	0	0	0	0	0	1	0	0	0	0	0	0	0	0	0	0	0	0	0	0	0
43	2023-02-16	65682	26	1	30	30	2	3	22.1	1	9	1	1	1		0	0		0	0	2	1	2	2	0	1	1	0	0	0	0	0	0	0	0	0	0	0	0	0	0	0	0	0	0
44	2023-02-17	65683	27	1	34	34	1	4	24	3	10.6	2	1	2		0	0		0	0	1	1	1	1	0	0	0	0	0	1	0	0	0	0	0	0	0	0	0	0	0	0	0	0	0
45	2023-02-16	65684	28	1	33	33	1	7	22.3	4	8.9	2	1	2	2	1	1		1	0	1	1	2	2	0	0	0	0	1	0	0	0	0	0	0	0	0	0	0	0	0	0	0	0	0
46	2023-02-16	65686	29	1	33	32	1	6	19.5	4	9.1	2	1	2	2	1	1		1	0	2	1	4	1	1	1	1	0	0	0	0	0	0	0	0	0	0	0	0	0	0	0	0	0	0
48	2023-02-18	65695	30	1	30	30	1	1	20.1	3	8.6	2	1	0	2	1	1		1	0	6	2	2	2	0	1	0	1	0	1	1	1	1	0	0	0	0	0	0	0	0	0	0	0	0
52	2023-02-17	65699	31	1	30	29	2	2	23.5	2	9.6	2	1	0		0	0		0	0	5	2	2	1	1	1	1	0	1	0	0	0	0	0	0	0	0	0	0	0	1	0	0	0	1
54	2023-02-17	65702	32	1	24	24	1	3	16.9	1	8.5	1	1	1		0	0		0	0	4	2	1	1	1	1	0	0	1	0	1	0	1	0	0	0	0	0	0	0	0	0	0	0	0
55	2023-02-17	65703	33	1	32	32	1	6	19.7	1	8.2	2	1	0	1	1	1		1	0	4	2	2	2	0	1	1	0	0	0	1	0	1	0	0	0	0	0	0	0	0	0	0	0	0
56	2023-02-17	65705	34	1	32	31	2	6	25.5	4	8	2	1	0		0	0		0	0	1	1	1	2	0	1	0	0	0	0	0	0	0	0	0	0	0	0	0	0	0	0	0	0	0
57	2023-02-17	65707	35	1	39	39	1	1	27.2	1	8.3	2	1	2	1	1	1		1	0	3	1	1	2	0	1	1	0	0	0	0	0	1	0	0	0	0	0	0	0	0	0	0	0	0
58	2023-02-18	65709	36	1	34	34	1	5	16.9	1	9.4	2	1	1		1	0		0	0	3	1	2	2	0	1	0	0	1	0	0	0	1	0	0	0	0	0	0	0	0	0	0	0	0
60	2023-02-17	65712	37	1	30	30	1	2	21.6	3	7.9	2	1	2		0	0		0	0	3	1	1	2	1	0	0	0	0	1	0	0	0	0	0	1	0	0	0	0	0	1	0	0	0
63	2023-02-18	65716	38	1	33	33	1	5	23.4	4	7.8	1	1	1		0	0		0	0	6	2	5	1	0	1	1	1	1	1	0	0	0	0	0	0	0	0	0	0	0	0	0	1	1
64	2023-02-19	65717	39	1	34	34	1	3	20.7	2	9.5	2	1	2	2	1	1		1	0	3	1	1	2	0	1	1	1	0	0	0	0	0	0	0	0	0	0	0	0	0	0	0	0	0
65	2023-02-18	65718	40	1	24	24	1	3	16.4	1	12.1	1	1	1		0	0		0	0	8	3	1	1	1	1	0	0	1	0	1	1	1	1	1	1	0	0	0	0	0	0	0	0	0
66	2023-02-18	65719	41	1	35	35	1	2	20.3	2	8.2	2	1	2	2	1	1		1	0	5	2	5	2	0	1	1	1	1	1	0	0	0	0	0	0	0	0	0	0	0	0	0	0	0
68	2023-02-19	65721	42	1	41	41	1	8	21.9	1	9.3	2	1	2		0	0		0	0	4	2	1	1	0	1	1	0	1	0	0	0	0	0	0	0	0	0	0	0	1	0	0	0	0
70	2023-02-19	65723	43	1	35	35	1	4	18.8	1	8.6	2	1	1		0	0		0	0	17	3	4	1	1	1	1	1	1	1	1	1	1	1	1	1	0	1	1	0	1	1	1	1	1
71	2023-02-19	65724	44	1	32	32	1	3	19	3	7.8	1	1	1	1	1	1		0	1	3	1	1	2	0	1	0	0	1	0	0	0	1	0	0	0	0	0	0	0	0	0	0	0	0
72	2023-02-19	65725	45	1	31	31	1	11	20.1	2	7.8	1	1	0	1	1	1		1	0	3	1	2	1	1	1	0	0	0	1	1	0	0	0	0	0	0	0	0	0	0	0	0	0	0
73	2023-02-20	65726	46	1	34	34	1	1	28.3	1	7.3	1	2	0		0	0		0	0	4	2	3	2	1	1	1	0	0	0	1	0	0	0	0	0	0	0	0	0	1	0	0	0	0
74	2023-02-19	65730	47	1	26	26	2	2	22.5	1	9.4	1	1	0	1	1	1		0	1	2	1	1	2	1	0	0	0	0	0	0	0	0	0	0	0	0	0	0	0	0	0	0	0	0
76	2023-02-19	65734	48	1	32	31	2	5	19	2	8.4	1	1	1	1	1	1		1	0	4	2	4	1	0	1	0	0	0	0	0	0	1	0	0	0	1	0	0	0	1	0	0	0	0
77	2023-02-19	65735	49	1	35	33	2	1	24.6	2	7.4	2	1	1		1	0		0	0	2	1	2	2	0	1	1	0	0	0	0	0	0	0	0	0	0	0	0	0	0	0	0	0	0
78	2023-02-19	65736	50	1	32	32	2	4	23.3	1	9.1	2	1	1		0	0		0	0	5	2	5	1	1	1	1	0	0	1	0	0	1	0	1	0	0	0	0	0	0	0	0	0	0
80	2023-02-19	65739	51	1	33	33	1	7	23.4	1	8.8	2	1	1	1	1	1		1	0	4	2	1	2	0	1	1	0	1	0	0	0	0	0	0	0	1	0	0	0	0	0	0	0	0
82	2023-02-19	65741	52	1	30	29	1	3	19.1	3	8.6	1	1	1	1	1	1		1	0	10	3	3	1	0	1	0	0	1	0	1	1	1	0	1	0	1	0	1	0	1	0	0	0	1
85	2023-02-20	65746	53	1	30	30	1	2	21.5	1	13	2	1	0	0	1	0		0	0	5	2	2	1	1	1	1	0	0	0	1	1	1	0	0	0	0	0	0	0	0	0	0	0	0
88	2023-02-20	65753	54	1	27	26	1	2	21.8	1	8.2	2	1	2	2	1	1		1	0	3	1	2	1	1	0	0	0	0	0	0	1	1	0	0	0	0	0	0	0	0	0	0	0	0
89	2023-02-20	65754	55	1	23	23	1	4	21.5	1	8.9	2	1	1		0	0		0	0	7	3	2	2	0	1	1	1	1	0	1	0	1	0	0	0	0	0	0	0	1	0	0	0	0
90	2023-02-20	65755	56	1	37	36	2	8	24.4	1	8	1	1	0	0	1	0		0	0	1	1	1	2	0	1	0	0	0	0	0	0	0	0	0	0	0	0	0	0	0	0	0	0	0
91	2023-02-20	65756	57	1	33	33	2	6	22	1	9.1	1	1	1		0	0		0	0	5	2	1	2	1	1	1	0	0	0	1	0	0	0	0	0	0	0	0	0	1	0	0	0	0
94	2023-02-21	65767	58	1	32	31	1	5		1	7.5	2	1	1		0	0		0	0	3	1	4	1	0	1	1	0	0	0	0	0	1	0	0	0	0	0	0	0	0	0	0	0	0
95	2023-02-21	65769	59	1	32	32	2	1	23.1	2	10.3	2	1	0		0	0		0	0	1	1	1	2	0	1	0	0	0	0	0	0	0	0	0	0	0	0	0	0	0	0	0	0	0
96	2023-02-21	65770	60	1	31	30	2	1	19.1	3	8.5	2	1	2	1	1	1		1	0	2	1	1	2	1	0	0	0	0	0	0	0	0	0	0	0	0	0	0	0	0	0	0	0	0
97	2023-02-21	65771	61	1	31	31	1	5	22	4	7.3	2	1	2	1	1	1		1	0	2	1	1	2	1	0	0	0	0	0	0	0	1	0	1	0	0	0	0	0	0	0	0	0	0
98	2023-02-21	65772	62	1	32	32	2	4	22.5	2	10.8	2	1	0		0	0		0	0	5	2	3	2	0	1	1	0	1	0	0	0	1	0	0	0	0	0	0	0	1	0	0	0	0
100	2023-02-23	65774	63	1	30	30	1	1	19.8	1	8.5	1	1	1	1	1	1		1	0	5	2	1	1	0	1	1	1	1	1	0	0	0	0	0	0	0	0	0	0	0	0	0	0	0
103	2023-02-22	65777	64	1	36	36	1	2	22.3	4	8.9	1	1	1		0	0		0	0	8	3	5	2	0	1	1	1	1	1	0	0	0	0	0	0	0	0	0	0	1	1	0	0	1
104	2023-02-22	65779	65	1	36	36	1	1	21.6	1	9.1	1	1	1		0	0		0	0	5	2	3	1	0	1	1	1	1	0	0	0	0	0	1	0	0	0	0	0	0	0	0	0	0
105	2023-02-22	65782	66	1	27	27	2	2	27.2	1	12.3	2	1	2	1	1	1		1	0	7	3	1	2	0	1	1	0	1	0	1	0	1	0	0	1	0	0	0	0	1	0	0	0	0
106	2023-02-23	65785	67	1	37	37	1	4	22.2	2	9	2	1	1	1	1	1		1	0	4	2	1	2	0	1	0	0	1	0	0	0	1	0	0	0	0	0	0	0	1	0	0	0	0
107	2023-02-23	65787	68	1	38	38	1	4	27.2	1	8.4	2	1	0		0	0		0	0	2	1	2	2	0	1	0	0	0	0	0	0	1	0	0	0	0	0	0	0	0	0	0	0	0
108	2023-02-23	65790	69	1	39	39	1	6	22.6	3	9.2	2	1	0	2	1	1		1	0	3	1	4	2	1	1	0	0	0	1	0	0	0	0	1	0	0	0	0	0	0	0	0	0	0
109	2023-02-23	65791	70	1	34	33	1	1	27.3	1	10.6	1	1	1	1	1	1		1	0	1	1	2	1	0	0	1	0	0	0	0	0	0	0	0	0	0	0	0	0	0	0	0	0	0
112	2023-02-24	65795	71	1	30	30	1	2	22.5	1	8.9	1	1	1		0	0		0	0	3	1	2	1	1	1	1	0	0	1	0	0	0	0	0	0	0	0	0	0	0	0	0	0	0
114	2023-01-01	65379	72	1	31	30	1	2	21	1	7.6	2	1	2	1	1	1	1	0	1	10	3	3	1	1	1	1	0	1	1	1	1	1	0	1	0	0	0	0	0	1	1	0	0	0
115	2023-01-01	65380	73	1	37	36	1	2	25	1	9.6	2	1	1	2	1	1		1	0	4	2	2	1	0	1	0	0	0	0	0	0	1	0	1	0	0	0	0	0	1	0	0	0	0
116	2023-01-01	65381	74	1	33	33	1	4	24	1	7.1	2	1	2	2	1	1		1	0	5	2	2	1	0	1	1	1	0	0	0	0	1	0	0	0	0	0	0	0	0	0	0	0	0
117	2023-01-01	65382	75	1	27	26	2	4	19.1	2	8.3	2	1	1	1	1	1		1	0	2	1	2	1	0	1	0	0	0	0	0	0	0	0	1	0	0	0	0	0	0	0	0	0	0
121	2023-01-03	65388	76	1	35	35	1	7	24.8	4	7.7	2	1	1	2	1	1		1	0	6	2	2	1	0	1	0	0	1	0	0	1	1	0	0	0	1	0	0	0	1	0	0	0	0
124	2023-01-02	65391	77	1	32	32	2	1	20.2	1	7.9	1	1	1	1	1	1		1	0	2	1	1	1	0	1	1	0	0	0	0	0	0	0	0	0	0	0	0	0	0	0	0	0	0
132	2023-01-06	65409	78	1	33	33	1	3	23.4	2	8.7	2	1	1	1	1	1		1	0	5	2	2	1	0	1	1	1	1	0	0	0	0	0	1	0	0	0	0	0	0	0	0	0	0
133	2023-01-05	65415	79	1	31	31	1	3	21.5	2	8.5	2	1	2	2	1	1		1	0	7	3	2	1	0	1	0	0	1	0	1	1	1	1	0	0	0	0	0	0	1	0	0	0	0
138	2023-01-07	65423	80	1	37	37	1	2	24	3	8.5	1	1	1	1	1	1		1	0	5	2	2	1	0	1	0	0	1	1	0	0	0	0	1	0	0	0	0	0	1	0	0	0	0
139	2023-01-07	65428	81	1	32	32	1	2	18.6	1	10.1	2	1	1		0	0		0	0	6	2	2	1	0	1	1	0	1	0	1	0	1	0	0	0	0	0	0	0	1	0	0	0	0
143	2023-01-08	65434	82	1	33	33	1	6	18.8	1	8.6	2	1	1	1	1	1		1	0	1	1	1	1	0	1	0	0	0	0	0	0	0	0	0	0	0	0	0	0	0	0	0	0	0
144	2023-01-08	65437	83	1	32	32	1	3	23	1	9.7	1	1	1	1	1	1		1	0	7	3	1	1	1	1	1	0	1	1	0	0	1	0	1	0	0	0	0	0	1	0	0	0	0
154	2023-01-11	65450	84	1	30	30	1	4	22.7	2	9.6	1	1	1		0	0		0	0	2	1	1	1	0	1	0	0	1	0	0	0	0	0	0	0	0	0	0	0	0	0	0	0	0
155	2023-01-11	65451	85	1	32	32	2	3	27.3	3	7.4	2	1	0		0	0		0	0	2	1	2	1	0	1	1	0	0	0	0	0	0	0	0	0	0	0	0	0	0	0	0	0	0
157	2023-01-11	65454	86	1	31	31	2	9	24.2	1	9	2	1	2	1	1	1		1	0	3	1	5	1	0	0	1	1	1	0	0	0	0	0	0	0	0	0	0	0	0	0	0	0	0
158	2023-01-12	65455	87	1	32	32	1	3	19.9	3	8.1	2	1	1	1	1	1	1	0	1	7	3	4	1	1	0	0	0	0	0	0	0	0	0	0	0	0	0	0	0	0	0	0	0	0
160	2023-01-13	65465	88	1	34	34	1	11	24	3	8.4	1	1	0		0	0		0	0	3	1	5	1	0	1	1	0	0	1	0	1	0	0	0	0	0	0	0	0	0	0	0	0	0
162	2023-01-12	65467	89	1	27	23	2	3	24.8	1	9.4	2	1	2	2	1	1		1	0	5	2	2	1	0	1	1	0	1	0	1	0	0	0	1	0	0	0	0	0	0	0	0	0	0
164	2023-02-02	65507	90	1	35	35	1	4	23.8	1	9.2	2	1	2	1	1	1		1	0	5	2	2	1	0	1	0	0	1	0	1	0	0	0	1	0	0	0	0	0	1	0	0	0	0
170	2023-02-03	65521	91	1	35	35	1	5	21.9	3	8.5	1	1	1	1	1	1	1	0	0	2	1	1	1	0	1	0	0	0	0	0	0	1	0	0	0	0	0	0	0	0	0	0	0	0
173	2023-02-04	65533	92	1	39	39	1	2	27	1	8.5	1	1	1	1	1	1		1	0	8	3	4	1	0	1	1	0	0	0	1	0	1	1	1	1	0	0	0	0	1	0	0	0	0
181	2023-02-06	65541	93	1	31	31	1	3	25.1	1	7.6	2	1	0		0	0		0	0	4	2	1	1	0	1	0	0	0	0	1	0	1	0	1	0	0	0	0	0	0	0	0	0	0
182	2023-02-06	65543	94	1	36	36	1	3	19.7	1	8.4	1	1	1		0	0		0	0	6	2	4	1	1	1	1	0	1	0	0	0	1	0	1	1	0	0	0	0	0	0	0	0	0
183	2023-02-06	65544	95	1	33	33	1	10	22.7	3	9.4	2	1	1	1	1	1		1	0	1	1	1	1	1	1	0	0	0	0	0	0	0	0	0	0	0	0	0	0	0	0	0	0	0
185	2023-02-07	65546	96	1	31	31	1	6	20.2	3	9.6	1	1	1	1	1	1		1	0	5	2	2	1	1	1	1	0	1	1	0	0	1	0	0	0	0	0	0	0	0	0	0	0	0
189	2023-02-09	65561	97	1	28	28	1	2	21.9	4	8	1	1	1	1	1	1		1	0	2	1	2	1	1	1	0	0	1	0	0	0	0	0	0	0	0	0	0	0	0	0	0	0	0
190	2023-02-08	65562	98	1	28	28	1	8	19.2	1	8.2	2	1	2	1	1	1		1	0	8	3	3	1	0	1	1	0	1	1	0	0	1	0	1	0	0	0	0	0	1	0	0	0	1
192	2023-02-09	65565	99	1	31	31	1	7	19.9	1	7.9	2	1	1	1	1	1		1	0	6	2	2	1	0	1	1	0	1	0	1	0	1	0	1	0	0	0	0	0	0	0	0	0	0
196	2023-02-10	65573	100	1	28	27	1	1	19.4	2	8.7	2	1	1	1	1	1		1	0	2	1	1	1	1	1	0	0	1	0	0	0	0	0	0	0	0	0	0	0	0	0	0	0	0
198	2023-02-24	65796	101	1	34	34	1	2	22.4	4	9.8	1	1	1	1	1	1		1	0	3	1	3	1	0	1	1	0	1	0	0	0	0	0	0	0	0	0	0	0	0	0	0	0	0
199	2023-02-23	65798	102	1	28	28	2	1	22.3	1	8.8	1	1	1	1	1	1		1	0	2	1	2	2	0	1	0	0	1	0	0	0	0	0	0	0	0	0	0	0	0	0	0	0	0
200	2023-02-23	65799	103	1	26	24	1	3	24.7	1	8.9	2	1	0	1	1	1		1	0	2	1	1	2	0	1	0	0	0	0	0	0	0	0	0	0	0	0	0	0	1	0	0	0	0
202	2023-02-23	65802	104	1	30	30	2	7	21.1	1	8.5	1	1	1		1	0		0	0	4	2	2	2	1	0	0	0	0	0	0	0	0	0	0	0	0	0	0	0	0	0	0	0	0
203	2023-02-23	65803	105	1	34	33	2	3	20.1	1	9.1	1	2	0		0	0		0	0	1	1	2	2	0	0	0	0	1	0	0	0	0	0	0	0	0	0	0	0	0	0	0	0	0
204	2023-02-23	65804	106	1	27	26	1	1	23.1	3	9.7	1	1	0	2	1	1		1	0	4	2	2	2	0	1	1	0	1	0	0	0	0	0	0	0	0	0	0	0	1	0	0	0	0
205	2023-02-24	65806	107	1	35	35	1	7	22.7	1	8.8	2	1	0		1	0		0	0	5	2	2	2	0	1	1	1	1	0	0	0	1	0	0	0	0	0	0	0	0	0	0	0	0
206	2023-02-24	65807	108	1	27	27	1	5	26	1	10	2	1	0		0	0		0	0	2	1	1	2	1	1	1	0	0	0	0	0	0	0	0	0	0	0	0	0	0	0	0	0	0
207	2023-02-24	65808	109	1	27	27	1	1	17.7	3	9.2	1	1	1	1	1	1		1	0	2	1	1	2	0	1	0	0	1	0	0	0	0	0	0	0	0	0	0	0	0	0	0	0	0
208	2023-02-24	65809	110	1	35	34	1	9	29	1	9.1	2	1	0	1	1	1	1	1	0	3	1	2	1	0	1	1	1	0	0	0	0	0	0	0	0	0	0	0	0	0	0	0	0	0
210	2023-02-24	65819	111	1	32	32	1	4	21.8	1	8.5	2	1	2		0	0		0	0	1	1	1	2	0	1	0	0	0	0	0	0	0	0	0	0	0	0	0	0	0	0	0	0	0
213	2023-02-25	65828	112	1	31	30	1	4	23.9	1	9.6	2	1	2	1	1	1		1	0	3	1	1	2	1	1	0	0	1	0	0	0	0	0	0	0	0	0	0	0	1	0	0	0	0
218	2023-02-25	65835	113	1	27	26	1	4	22.4	1	9.2	2	1	1		0	0		0	0	1	1	1	2	0	1	0	0	0	0	0	0	0	0	0	0	0	0	0	0	0	0	0	0	0
219	2023-02-25	65836	114	1	34	34	1	4	21.3	1	8.5	1	1	1	1	1	1		1	0	4	2	1	2	1	1	1	1	1	0	0	0	0	0	0	0	0	0	0	0	0	0	0	0	0
222	2023-02-25	65840	115	1	28	28	1	1	19.5	3	9.1	2	1	0		0	0		0	0	5	2	4	2	0	1	1	1	0	0	1	0	1	0	0	0	0	0	0	0	0	0	0	0	0
223	2023-02-26	65841	116	1	35	35	1	2	26	3	9	2	1	0		0	0		0	0	2	1	1	2	0	1	0	0	0	0	0	0	0	0	0	0	0	0	0	0	1	0	0	0	0
224	2023-02-26	65842	117	1	34	34	1	7	23.2	1	7.7	2	1	2	2	1	1		1	0	9	3	2	2	0	1	1	1	1	1	1	0	1	0	1	1	0	0	0	0	0	0	0	0	0
225	2023-02-26	65843	118	1	23	23	1	3	21.6	3	9.1	1	1	1		0	0		0	0	3	1	2	1	0	1	1	0	1	0	0	0	0	0	0	0	0	0	0	0	0	0	0	0	0
226	2023-02-26	65844	119	1	35	35	1	8	21.1	1	8.8	2	1	1	1	1	1		1	0	3	1	1	2	0	1	1	0	1	0	0	0	0	0	0	0	0	0	0	0	0	0	0	0	0
228	2023-02-27	65847	120	1	37	37	1	2	24.5	1	9.1	1	1	1		0	0		0	0	5	2	2	2	0	1	1	0	1	1	0	0	1	0	0	0	0	0	0	0	0	0	0	0	0
229	2023-02-27	65848	121	1	32	32	1	4	21	1	9.3	2	1	0		0	0		0	0	4	2	2	1	0	1	0	0	1	0	0	0	0	0	0	0	0	0	0	0	1	1	0	0	0
230	2023-02-27	65849	122	1	32	32	1	2	23.4	3	14.8	1	1	1	1	1	1		1	0	1	1	1	2	0	1	0	0	0	0	0	0	0	0	0	0	0	0	0	0	0	0	0	0	0
231	2023-02-27	65850	123	1	29	29	1	4	22.6	4	8.1	2	1	1	1	1	1		1	0	2	1	2	2	0	1	1	0	0	0	0	0	0	0	0	0	0	0	0	0	0	0	0	0	0
233	2023-02-27	65859	124	1	26	25	2	4	24.7	4	8.6	1	2	1		0	0		0	0	7	3	2	2	0	1	1	0	1	0	1	0	1	0	1	0	0	0	0	0	0	1	0	0	0
235	2023-02-27	65861	125	1	34	33	1	2	22.8	1	9.1	2	1	2	1	1	1	1	1	0	1	1	2	2	0	0	0	0	0	1	0	0	0	0	0	0	0	0	0	0	0	0	0	0	0
236	2023-02-28	65863	126	1	29	29	1	4	20.2	4	8.6	2	1	0		0	0		0	0	3	1	2	1	0	1	0	0	1	0	0	0	1	0	0	0	0	0	0	0	0	0	0	0	0
238	2023-03-01	65865	127	1	40	40	1	1	24.8	3	7.5	2	1	2		1	1		0	1	7	3	5	2	0	1	1	1	1	0	1	0	0	0	0	0	0	0	0	0	0	1	0	0	1
241	2023-03-01	65870	128	1	33	33	1	2	21.5	3	9.3	1	1	1		1	1		1	0	3	1	1	2	0	1	1	1	0	0	0	0	0	0	0	0	0	0	0	0	0	0	0	0	0
244	2023-03-01	65876	129	1	32	31	1	3	21.2	2	8.8	1	1	0		1	1		1	0	5	2	2	2	1	1	1	1	1	1	0	0	0	0	0	0	0	0	0	0	0	0	0	0	0
245	2023-03-01	65878	130	1	31	31	1	3	20.7	1	8	1	1	1		0	0		0	0	1	1	1	2	1	0	0	0	0	1	0	0	0	0	0	0	0	0	0	0	0	0	0	0	0
246	2023-03-01	65880	131	1	29	27	1	4	22.4	3	10.4	2	1	2		1	1		1	0	3	1	2	2	0	1	1	0	0	0	0	0	1	0	0	0	0	0	0	0	1	0	0	0	0
247	2023-03-01	65881	132	1	30	30	1	6	22.6	1	8.9	1	1	1		0	0		0	0	3	1	1	2	0	1	0	0	1	0	0	0	1	0	0	0	0	0	0	0	0	0	0	0	0
251	2023-03-02	65889	133	1	23	23	1	2	18.8	1	8.6	1	1	1		0	0		0	0	2	1	1	2	0	1	1	0	0	0	0	0	0	0	0	0	0	0	0	0	0	0	0	0	0
252	2023-03-02	65891	134	1	31	28	1	2	19.6	3	11	2	1	2		1	1		1	0	7	3	3	2	0	1	1	0	1	1	1	1	1	0	0	0	0	0	0	0	0	0	0	0	0
253	2023-03-02	65892	135	1	23	23	2	1	20.1	1	9.1	2	1	0		0	0		0	0	6	2	1	2	1	1	0	0	1	0	1	1	1	0	0	0	0	0	0	0	1	0	0	0	0
254	2023-03-04	65893	136	1	34	34	1	13	22.9	1	13	1	2	0		0	0		0	0	4	2	3	2	0	1	1	1	1	0	0	0	0	0	0	0	0	0	0	0	0	0	0	0	0
259	2023-03-02	65898	137	1	41	41	1	5	20.4	1	8.8	1	2	0		0	0		0	0	7	3	3	2	0	1	1	1	0	0	1	0	0	0	1	0	0	0	1	0	1	0	0	0	0
262	2023-02-09	65576	138	1	35	35	1	2	18.2	3	7.8	2	1	1		0	0		0	0	10	3	5	1	0	1	1	0	1	0	1	1	0	0	1	0	1	0	1	0	1	0	0	0	1
264	2023-02-11	65582	139	1	41	41	1	10	31.4	1	9.8	2	1	2		0	0		0	0	2	1	3	1	0	0	1	0	1	0	0	0	0	0	0	0	0	0	0	0	0	0	0	0	0
267	2023-02-11	65599	140	1	34	34	1	1	17.7	2	7.7	1	1	1		0	0		0	0	1	1	1	1	0	1	0	0	0	0	0	0	0	0	0	0	0	0	0	0	0	0	0	0	0
270	2023-02-11	65602	141	1	35	35	1	2	22.5	1	9	1	1	1	1	1	1		0	1	4	2	1	1	0	1	0	0	0	0	0	0	1	1	0	0	0	0	0	0	1	0	0	0	0
271	2023-02-12	65603	142	1	41	41	1	2	24.4	2	6.5	2	1	1		0	0		0	0	2	1	2	1	0	1	0	0	0	1	0	0	0	0	0	0	0	0	0	0	0	0	0	0	0
272	2023-02-12	65604	143	1	25	25	1	5	29.7	3	13.7	2	1	2	1	1	1		1	0	6	2	2	1	0	1	1	1	1	0	1	0	1	0	0	0	0	0	0	0	0	0	0	0	0
274	2023-02-13	65608	144	1	30	30	1	1	24.2	1	8.4	2	1	2		0	0		0	0	10	3	2	1	0	1	1	1	1	1	1	0	1	0	0	0	1	0	0	0	0	0	0	1	1
275	2023-02-13	65609	145	1	25	25	1	2	21	1	9.5	2	1	2		0	0		0	0	3	1	1	1	0	1	1	0	0	0	0	0	1	0	0	0	0	0	0	0	0	0	0	0	0
278	2023-02-13	65615	146	1	38	38	1	6	24.1	1	8.8	2	1	2		0	0		0	0	5	2	2	1	0	1	0	0	0	0	0	1	1	0	1	0	0	0	0	0	1	0	0	0	0
280	2023-02-13	65617	147	1	32	32	1	6	19.7	1	8.4	2	1	2	2	1	1		1	0	7	3	2	1	0	1	1	0	1	0	1	0	1	0	1	0	0	0	0	0	1	0	0	0	0
281	2023-02-13	65618	148	1	27	26	1	3	20.4	1	8.8	1	1	1	2	1	1		1	0	1	1	1	1	0	1	0	0	0	0	0	0	0	0	0	0	0	0	0	0	0	0	0	0	0
282	2023-02-14	65619	149	1	36	36	1	6	16.9	1	8.7	1	1	1		0	0		0	0	4	2	1	1	0	1	1	1	1	0	0	0	0	0	0	0	0	0	0	0	0	0	0	0	0
285	2023-02-14	65622	150	1	33	31	1	1	26.4	1	8.8	2	1	2	2	1	1		1	0	4	2	2	1	1	1	0	0	1	1	0	0	0	0	0	0	0	0	0	0	1	0	0	0	0
287	2023-02-14	65624	151	1	35	35	1	6	22.1	2	10.5	1	1	1	1	1	1		1	0	3	1	1	1	1	1	1	0	0	0	1	0	0	0	0	0	0	0	0	0	0	0	0	0	0
288	2023-02-15	65626	152	1	36	35	2	11	25.5	1	10.8	1	1	1		0	0		0	0	4	2	1	1	0	1	1	0	0	0	1	0	0	0	0	1	0	0	0	0	1	0	0	0	0
290	2023-02-14	65628	153	1	30	30	2	1	22.5	2	11.1	1	1	1	1	1	1		1	0	4	2	2	1	1	1	1	1	1	0	0	0	0	0	0	0	0	0	0	0	0	0	0	0	0
291	2023-02-14	65629	154	1	31	31	1	2	23.3	1	10.4	2	1	0		0	0		0	0	5	2	4	1	1	1	1	0	1	0	1	0	0	0	1	0	0	0	0	0	0	0	0	0	0
292	2023-02-14	65630	155	1	39	39	2	1	21.9	1	9.8	2	1	2		0	0		0	0	2	1	1	1	1	1	0	0	0	0	0	0	0	0	1	0	0	0	0	0	0	0	0	0	0
293	2023-02-14	65631	156	1	33	33	2	6	27.7	1	9	2	1	1		1	1	1	0	0	3	1	2	1	1	1	1	0	0	0	0	0	0	0	1	0	0	0	0	0	0	0	0	0	0
302	2023-02-15	65656	157	1	33	33	1	3	22.5	1	8.8	2	1	2		0	0		0	0	5	2	2	1	0	0	0	0	0	0	0	0	0	0	0	0	0	0	0	0	0	0	0	0	0
303	2023-02-15	65657	158	1	30	30	1	4	19.1	3	9.1	2	1	1	1	1	1		1	0	2	1	1	2	0	0	0	0	0	0	0	0	0	0	0	0	0	0	0	0	0	0	0	0	0
305	2023-02-15	65659	159	1	31	31	1	8	25.1	2	12.4	2	1	1		1	0		0	0	5	2	4	1	0	0	0	0	0	0	0	0	0	0	0	0	0	0	0	0	0	0	0	0	0
306	2023-02-15	65660	160	1	41	41	1	7	25.7	1	8.8	2	1	0		0	0		0	0	6	2	5	1	0	0	0	0	0	0	0	0	0	0	0	0	0	0	0	0	0	0	0	0	0

## Sheet: Sheet1
The exclusion cycles include:	number
Age > 42 years	4
A history of failed ET ≥3 times	20
Chromosomal abnormality	6
sperm donor	3
Uterine factor：	69
Uterine malformation	8
Scar uterus	33
Adenomyosis	8
Uterine adhesions	8
Multiple uterine fibroids	7
Submucosal myoma	1
Endometrial lesions	4
ET cycle ≥2 times during this period	3
Sequential ET	4
Refused to questionnaire	14
No symptoms and has not been tested in any way	23
total	146
Endometrial preparation
Natural cycle=1
Hormonal replacement therapy=2
Embryo developmental stage
Cleavage=1
Blastocyst=2
Methods of COVID-19 diagnosis
nucleic acid testing=1
antigen testing=2
symptom-based diagnosis=3
Symptom duration
1~7=1
7~14=2
14~21=3
21~28=4
≥28=5
Days from COVID-19 infected to transfer
≤2 months=1
>2 months=2
Number of COVID-19 symptoms(n)
1~3=1
4-6=2
≥7=3
