# Supplementary material for: The impact of coronavirus disease 2019 on frozen-thawed embryo transfer outcomes
Source: PeerJ. 2024 Sep 26;12:e18112. doi: 10.7717/peerj.18112 (PMC11439401; doi:10.7717/peerj.18112)
Supplement: Supplemental Information 2 [file peerj-12-18112-s002.xlsx]

## Sheet: Sheet1
code	group	age at ET	opu-age	Infertility duration (years)	Body mass index	Infertility cause	Number of previous pregnancies	Number of previous delivery	Endometrial preparation	Endometrial thickness (mm)	No. embryos transferred	Embryo developmental stage	good-quality embryo	Luteal support protocols	Embryo implantation	Biochemical pregnancy	Clinical pregnancy	Ongoing pregnancy	Early abortion
1	1	29	29	2	20.9	1=Tubal factor	0	0	1=Natural cycle	12	1	2=Blastocyst	1	1=dydrogesterone administered by the oral	1	1	1	1	0
2	1	26	26	6	23.2	2=Ovarian factor	1	0	2=Hormonal replacement therapy	9.9	1	1=Cleavage	1	2=vaginal 90 mg/d; Crinone		0	0	0	0
3	1	31	31	2	20.3	1	0	0	2	8.7	1	1	1	2	1	1	1	1	0
4	1	29	29	4	20.8	4=Unexplained infertility	0	0	1	8.4	2	1	2	2	2	1	1	1	0
5	1	39	39	3	19.8	1	1	0	1	7.7	2	1	0	2		0	0	0	0
6	1	30	29	1	27	1	0	0	2	7.7	2	1	2	2	1	1	1	1	0
7	1	31	31	3	25.1	1	0	0	1	8.9	1	1	1	2		0	0	0	0
8	1	27	27	4	26.4	2	0	0	2	7.7	1	1	1	2		0	0	0	0
9	1	33	33	6	22.8	2	0	0	2	8.9	1	1	1	2	1	1	1	0	1
10	1	35	32	4	21.2	1	1	0	1	6.6	2	1	1	2		0	0	0	0
11	1	33	32	5	26.6	2	1	0	1	8.9	1	1	1	1	1	1	1	1	0
12	1	35	35	6	23	1	1	0	1	7.5	2	1	0	2	2	1	1	1	0
13	1	33	33	5	19.3	3=Male factor	0	0	1	8.8	1	1	1	2		0	0	0	0
14	1	31	30	2	20.4	3	0	0	1	9.4	2	1	2	2		0	0	0	0
15	1	33	33	3	21.3	1	0	0	2	9.6	1	1	1	2		0	0	0	0
16	1	35	35	2	26.4	1	0	0	1	10.1	2	1	0	1		0	0	0	0
17	1	35	35	7	41.7	4	1	0	1	9	2	1	2	1		0	0	0	0
18	1	32	32	1	20	4	1	0	1	9	2	1	0	1	1	1	1	1	0
19	1	28	27	2	21	1	0	0	1	8.1	2	1	2	2	2	1	1	1	0
20	1	33	33	3	19.5	3	0	0	1	9	1	1	1	2	1	1	1	1	0
21	1	29	29	5	22.5	1	0	0	1	9.3	1	1	1	2	1	1	1	1	0
22	1	33	33	4	17.3	1	0	0	1	8.7	1	1	0	2		0	0	0	0
23	1	36	36	5	19.6	1	2	1	1	9.7	2	1	2	1	2	1	1	1	0
24	1	37	36	4	23.3	1	3	0	1	8.6	2	1	2	2	1	1	1	1	0
25	1	28	28	5	23.1	2	0	0	2	12.5	1	1	1	2		0	0	0	0
26	1	30	30	3	22.1	1	0	0	2	9	1	1	1	2		0	0	0	0
27	1	34	34	4	24	3	0	0	1	10.6	2	1	2	1		0	0	0	0
28	1	33	33	7	22.3	4	1	0	1	8.9	2	1	2	2	2	1	1	1	0
29	1	33	32	6	19.5	4	0	0	1	9.1	2	1	2	2	2	1	1	1	0
30	1	30	30	1	20.1	3	2	1	1	8.6	2	1	0	1	2	1	1	1	0
31	1	30	29	2	23.5	2	0	0	2	9.6	2	1	0	2		0	0	0	0
32	1	24	24	3	16.9	1	0	0	1	8.5	1	1	1	2		0	0	0	0
33	1	32	32	6	19.7	1	1	0	1	8.2	2	1	0	2	1	1	1	1	0
34	1	32	31	6	25.5	4	0	0	2	8	2	1	0	2		0	0	0	0
35	1	39	39	1	27.2	1	1	0	1	8.3	2	1	2	2	1	1	1	1	0
36	1	34	34	5	16.9	1	0	0	1	9.4	2	1	1	1	0	1	0	0	0
37	1	30	30	2	21.6	3	1	0	1	7.9	2	1	2	2		0	0	0	0
38	1	33	33	5	23.4	4	0	0	1	7.8	1	1	1	2		0	0	0	0
39	1	34	34	3	20.7	2	1	0	1	9.5	2	1	2	2	2	1	1	1	0
40	1	24	24	3	16.4	1	0	0	1	12.1	1	1	1	1		0	0	0	0
41	1	35	35	2	20.3	2	1	0	1	8.2	2	1	2	2	2	1	1	1	0
42	1	41	41	8	21.9	1	3	2	1	9.3	2	1	2	2		0	0	0	0
43	1	35	35	4	18.8	1	0	0	1	8.6	2	1	1	1		0	0	0	0
44	1	32	32	3	19	3	1	0	1	7.8	1	1	1	2	1	1	1	0	1
45	1	31	31	11	20.1	2	0	0	1	7.8	1	1	0	2	1	1	1	1	0
46	1	34	34	1	28.3	1	1	0	1	7.3	1	2	0	2		0	0	0	0
47	1	26	26	2	22.5	1	2	0	2	9.4	1	1	0	2	1	1	1	0	1
48	1	32	31	5	19	2	0	0	2	8.4	1	1	1	2	1	1	1	1	0
49	1	35	33	1	24.6	2	1	0	2	7.4	2	1	1	2	0	1	0	0	0
50	1	32	32	4	23.3	1	0	0	2	9.1	2	1	1	2		0	0	0	0
51	1	33	33	7	23.4	1	0	0	1	8.8	2	1	1	1	1	1	1	1	0
52	1	30	29	3	19.1	3	0	0	1	8.6	1	1	1	1	1	1	1	1	0
53	1	30	30	2	21.5	1	0	0	1	13	2	1	0	1	0	1	0	0	0
54	1	27	26	2	21.8	1	0	0	1	8.2	2	1	2	2	2	1	1	1	0
55	1	23	23	4	21.5	1	0	0	1	8.9	2	1	1	1		0	0	0	0
56	1	37	36	8	24.4	1	1	0	2	8	1	1	0	2	0	1	0	0	0
57	1	33	33	6	22	1	0	0	2	9.1	1	1	1	2		0	0	0	0
58	1	32	31	5	19.8	1	0	0	1	7.5	2	1	1	2		0	0	0	0
59	1	32	32	1	23.1	2	1	0	2	10.3	2	1	0	2		0	0	0	0
60	1	31	30	1	19.1	3	2	0	2	8.5	2	1	2	2	1	1	1	1	0
61	1	31	31	5	22	4	2	0	1	7.3	2	1	2	2	1	1	1	1	0
62	1	32	32	4	22.5	2	1	0	2	10.8	2	1	0	2		0	0	0	0
63	1	30	30	1	19.8	1	1	0	1	8.5	1	1	1	1	1	1	1	1	0
64	1	36	36	2	22.3	4	0	0	1	8.9	1	1	1	1		0	0	0	0
65	1	36	36	1	21.6	1	2	0	1	9.1	1	1	1	2		0	0	0	0
66	1	27	27	2	27.2	1	1	0	2	12.3	2	1	2	2	1	1	1	1	0
67	1	37	37	4	22.2	2	0	0	1	9	2	1	1	1	1	1	1	1	0
68	1	38	38	4	27.2	1	3	0	1	8.4	2	1	0	1		0	0	0	0
69	1	39	39	6	22.6	3	1	1	1	9.2	2	1	0	2	2	1	1	1	0
70	1	34	33	1	27.3	1	0	0	1	10.6	1	1	1	2	1	1	1	1	0
71	1	30	30	2	22.5	1	1	0	1	8.9	1	1	1	1		0	0	0	0
72	1	31	30	2	21	1	5	0	1	7.6	2	1	2	2	1	1	1	0	1
73	1	37	36	2	25	1	0	0	1	9.6	2	1	1	1	2	1	1	1	0
74	1	33	33	4	24	1	1	0	1	7.1	2	1	2	1	2	1	1	1	0
75	1	27	26	4	19.1	2	1	0	2	8.3	2	1	1	2	1	1	1	1	0
76	1	35	35	7	24.8	4	0	0	1	7.7	2	1	1	2	2	1	1	1	0
77	1	32	32	1	20.2	1	1	0	2	7.9	1	1	1	2	1	1	1	1	0
78	1	33	33	3	23.4	2	0	0	1	8.7	2	1	1	1	1	1	1	1	0
79	1	31	31	3	21.5	2	0	0	1	8.5	2	1	2	1	2	1	1	1	0
80	1	37	37	2	24	3	0	0	1	8.5	1	1	1	1	1	1	1	1	0
81	1	32	32	2	18.6	1	0	0	1	10.1	2	1	1	2		0	0	0	0
82	1	33	33	6	18.8	1	0	0	1	8.6	2	1	1	2	1	1	1	1	0
83	1	32	32	3	23	1	0	0	1	9.7	1	1	1	1	1	1	1	1	0
84	1	30	30	4	22.7	2	0	0	1	9.6	1	1	1	1		0	0	0	0
85	1	32	32	3	27.3	3	0	0	2	7.4	2	1	0	2		0	0	0	0
86	1	31	31	9	24.2	1	0	0	2	9	2	1	2	2	1	1	1	1	0
87	1	32	32	3	19.9	3	0	0	1	8.1	2	1	1	2	1	1	1	0	1
88	1	34	34	11	24	3	0	0	1	8.4	1	1	0	2		0	0	0	0
89	1	27	23	3	24.8	1	2	2	2	9.4	2	1	2	2	2	1	1	1	0
90	1	35	35	4	23.8	1	4	0	1	9.2	2	1	2	1	1	1	1	1	0
91	1	35	35	5	21.9	3	0	0	1	8.5	1	1	1	1	1	1	1	0	0
92	1	39	39	2	27	1	2	0	1	8.5	1	1	1	2	1	1	1	1	0
93	1	31	31	3	25.1	1	6	0	1	7.6	2	1	0	2		0	0	0	0
94	1	36	36	3	19.7	1	0	0	1	8.4	1	1	1	2		0	0	0	0
95	1	33	33	10	22.7	3	1	0	1	9.4	2	1	1	1	1	1	1	1	0
96	1	31	31	6	20.2	3	0	0	1	9.6	1	1	1	1	1	1	1	1	0
97	1	28	28	2	21.9	4	1	0	1	8	1	1	1	2	1	1	1	1	0
98	1	28	28	8	19.2	1	0	0	1	8.2	2	1	2	2	1	1	1	1	0
99	1	31	31	7	19.9	1	0	0	1	7.9	2	1	1	2	1	1	1	1	0
100	1	28	27	1	19.4	2	0	0	1	8.7	2	1	1	2	1	1	1	1	0
101	1	34	34	2	22.4	4	1	1	1	9.8	1	1	1	2	1	1	1	1	0
102	1	28	28	1	22.3	1	1	0	2	8.8	1	1	1	2	1	1	1	1	0
103	1	26	24	3	24.7	1	1	1	1	8.9	2	1	0	2	1	1	1	1	0
104	1	30	30	7	21.1	1	1	1	2	8.5	1	1	1	2	0	0	0	0	0
105	1	34	33	3	20.1	1	0	0	2	9.1	1	2	0	2		0	0	0	0
106	1	27	26	1	23.1	3	1	0	1	9.7	1	1	0	1	2	1	1	1	0
107	1	35	35	7	22.7	1	1	0	1	8.8	2	1	0	2	0	1	0	0	0
108	1	27	27	5	26	1	0	0	1	10	2	1	0	1		0	0	0	0
109	1	27	27	1	17.7	3	0	0	1	9.2	1	1	1	1	1	1	1	1	0
110	1	35	34	9	29	1	0	0	1	9.1	2	1	0	1	1	1	1	1	0
111	1	32	32	4	21.8	1	0	0	1	8.5	2	1	2	2		0	0	0	0
112	1	31	30	4	23.9	1	0	0	1	9.6	2	1	2	2	1	1	1	1	0
113	1	27	26	4	22.4	1	0	0	1	9.2	2	1	1	2		0	0	0	0
114	1	34	34	4	21.3	1	3	1	1	8.5	1	1	1	2	1	1	1	1	0
115	1	28	28	1	19.5	3	0	0	1	9.1	2	1	0	1		0	0	0	0
116	1	35	35	2	26	3	3	1	1	9	2	1	0	2		0	0	0	0
117	1	34	34	7	23.2	1	0	0	1	7.7	2	1	2	2	2	1	1	1	0
118	1	23	23	3	21.6	3	0	0	1	9.1	1	1	1	1		0	0	0	0
119	1	35	35	8	21.1	1	1	0	1	8.8	2	1	1	1	1	1	1	1	0
120	1	37	37	2	24.5	1	1	1	1	9.1	1	1	1	2		0	0	0	0
121	1	32	32	4	21	1	1	0	1	9.3	2	1	0	1		0	0	0	0
122	1	32	32	2	23.4	3	0	0	1	14.8	1	1	1	1	1	1	1	1	0
123	1	29	29	4	22.6	4	0	0	1	8.1	2	1	1	2	1	1	1	1	0
124	1	26	25	4	24.7	4	1	0	2	8.6	1	2	1	2		0	0	0	0
125	1	34	33	2	22.8	1	0	0	1	9.1	2	1	2	1	1	1	1	1	0
126	1	29	29	4	20.2	4	0	0	1	8.6	2	1	0	1		0	0	0	0
127	1	40	40	1	24.8	3	3	0	1	7.5	2	1	2	2	1	1	1	0	1
128	1	33	33	2	21.5	3	0	0	1	9.3	1	1	1	1	1	1	1	1	0
129	1	32	31	3	21.2	2	0	0	1	8.8	1	1	0	2	1	1	1	1	0
130	1	31	31	3	20.7	1	1	0	1	8	1	1	1	2		0	0	0	0
131	1	29	27	4	22.4	3	0	0	1	10.4	2	1	2	1	1	1	1	1	0
132	1	30	30	6	22.6	1	0	0	1	8.9	1	1	1	1		0	0	0	0
133	1	23	23	2	18.8	1	0	0	1	8.6	1	1	1	1		0	0	0	0
134	1	31	28	2	19.6	3	2	1	1	11	2	1	2	1	1	1	1	1	0
135	1	23	23	1	20.1	1	1	0	2	9.1	2	1	0	2		0	0	0	0
136	1	34	34	13	22.9	1	0	0	1	13	1	2	0	1		0	0	0	0
137	1	41	41	5	20.4	1	1	0	1	8.8	1	2	0	1		0	0	0	0
138	1	35	35	2	18.2	3	1	0	1	7.8	2	1	1	2		0	0	0	0
139	1	41	41	10	31.4	1	0	0	1	9.8	2	1	2	1		0	0	0	0
140	1	34	34	1	17.7	2	2	1	1	7.7	1	1	1	2		0	0	0	0
141	1	35	35	2	22.5	1	3	2	1	9	1	1	1	1	1	1	1	0	1
142	1	41	41	2	24.4	2	1	0	1	6.5	2	1	1	2		0	0	0	0
143	1	25	25	5	29.7	3	1	0	1	13.7	2	1	2	2	1	1	1	1	0
144	1	30	30	1	24.2	1	3	1	1	8.4	2	1	2	2		0	0	0	0
145	1	25	25	2	21	1	1	0	1	9.5	2	1	2	1		0	0	0	0
146	1	38	38	6	24.1	1	2	0	1	8.8	2	1	2	2		0	0	0	0
147	1	32	32	6	19.7	1	0	0	1	8.4	2	1	2	2	2	1	1	1	0
148	1	27	26	3	20.4	1	0	0	1	8.8	1	1	1	2	2	1	1	1	0
149	1	36	36	6	16.9	1	0	0	1	8.7	1	1	1	1		0	0	0	0
150	1	33	31	1	26.4	1	4	1	1	8.8	2	1	2	2	2	1	1	1	0
151	1	35	35	6	22.1	2	0	0	1	10.5	1	1	1	1	1	1	1	1	0
152	1	36	35	11	25.5	1	2	1	2	10.8	1	1	1	2		0	0	0	0
153	1	30	30	1	22.5	2	2	0	2	11.1	1	1	1	2	1	1	1	1	0
154	1	31	31	2	23.3	1	0	0	1	10.4	2	1	0	1		0	0	0	0
155	1	39	39	1	21.9	1	0	0	2	9.8	2	1	2	2		0	0	0	0
156	1	33	33	6	27.7	1	2	0	2	9	2	1	1	2	1	1	1	0	0
157	1	33	33	3	22.5	1	3	0	1	8.8	2	1	2	1		0	0	0	0
158	1	30	30	4	19.1	3	0	0	1	9.1	2	1	1	1	1	1	1	1	0
159	1	31	31	8	25.1	2	0	0	1	12.4	2	1	1	1		1	0	0	0
160	1	41	41	7	25.7	1	2	0	1	8.8	2	1	0	2		0	0	0	0
161	2	32	32	6	21.1	3	0	0	1	8.1	2	1	2	1	2	1	1	1	0
162	2	32	32	5	22.7	1	0	0	1	10.8	2	1	2	1	0	0	0	0	0
163	2	31	30	3	21.5	1	2	1	1	9.4	1	1	1	1	1	1	1	1	0
164	2	31	31	5	19.6	4	0	0	1	8.5	1	1	1	2	0	0	0	0	0
165	2	27	27	2	17.5	1	0	0	1	8.7	2	1	2	1	0	0	0	0	0
166	2	33	32	3	21.6	1	0	0	2	8.8	2	1	2	2	0	0	0	0	0
167	2	40	40	1	23.2	2	0	0	1	8.8	2	1	0	1	0	0	0	0	0
168	2	32	32	9	20.2	3	0	0	1	8.9	2	1	0	2	2	1	1	1	0
169	2	29	29	4	22.1	1	1	1	1	8.2	1	1	1	2	0	0	0	0	0
170	2	29	29	3	27.5	1	1	0	2	9	2	1	0	2	0	0	0	0	0
171	2	28	28	3	23.2	1	2	1	2	11.5	1	1	1	2	0	0	0	0	0
172	2	29	29	5	22.9	1	0	0	1	14	2	1	2	1	0	0	0	0	0
173	2	29	29	2	22.3	3	0	0	2	10	2	1	2	2	1	1	1	1	0
174	2	33	32	4	23.6	1	0	0	1	8.7	2	1	0	2	0	0	0	0	0
175	2	35	35	6	18.8	1	0	0	1	8.1	2	1	2	2	0	0	0	0	0
176	2	32	32	3	21.6	3	4	0	1	6.7	2	1	2	2	1	1	1	1	0
177	2	36	35	1	18.8	1	2	0	1	9.1	2	1	2	2	0	0	0	0	0
178	2	31	31	4	22.2	1	1	0	1	7.8	1	1	0	2	0	0	0	0	0
179	2	29	29	3	25.6	1	0	0	1	9	1	1	1	2	0	0	0	0	0
180	2	31	31	1	24.7	1	3	0	1	9.8	2	1	0	2	0	1	0	0	0
181	2	30	30	2	18.4	1	0	0		9.1	2	1	2	2	1	1	1	0	1
182	2	31	31	2	21.1	2	1	0	2	8.4	2	1	2	2	1	1	1	1	0
183	2	34	34	5	21.4	3	0	0	1	8.7	2	1	1	1	0	0	0	0	0
184	2	27	27	2	21.2	1	0	0	2	9.3	1	1	1	2	0	0	0	0	0
185	2	37	37	8	25.9	3	2	0	1	9.2	2	1	2	2	0	0	0	0	0
186	2	31	30	5	24.1	1	0	0	2	10.2	2	1	0	2	0	0	0	0	0
187	2	33	33	3	18	4	0	0	1	9.7	1	1	1	1	1	1	1	1	0
188	2	31	31	2	20.2	4	0	0	1	10.8	2	1	2	1	0	0	0	0	0
189	2	39	39	6	23.2	1	0	0	1	9.4	2	1	0	1	0	0	0	0	0
190	2	29	29	4	22.6	1	0	0	2	8.8	2	1	0	2	0	0	0	0	0
191	2	34	33	11	23.4	1	2	0	2	10.6	2	1	1	2	2	1	1	0	1
192	2	36	36	2	23.9	1	1	0	2	8.6	2	1	2	2	2	1	1	1	0
193	2	33	32	5	25.3	3	1	0	2	9.3	2	1	2	2	2	1	1	1	0
194	2	32	32	5	25.1	1	0	0	1	13.5	2	1	0	1	0	0	0	0	0
195	2	29	29	6	18.5	3	0	0	1	8.2	1	2	0	1	1	1	1	1	0
196	2	30	30	4	21.6	3	1	0	1	8.1	2	1	1	1	0	0	0	0	0
197	2	28	28	5	21.1	1	0	0	1	8.1	2	1	1	2	2	1	1	1	0
198	2	25	25	4	22.8	3	0	0	2	14.6	2	1	2	2	1	1	1	1	0
199	2	26	26	3	20.2	2	0	0	2	8.7	2	1	2	2	0	0	0	0	0
200	2	31	31	3	20.7	1	0	0	1	10.3	2	1	2	2	1	1	1	1	0
201	2	31	31	2	19.6	3	0	0	1	9.7	2	1	1	1	1	1	1	1	0
202	2	33	33	6	21.5	1	4	0	2	10.4	2	1	2	2	2	1	1	1	0
203	2	35	33	8	21.5	1	0	0	2	8.9	2	1	1	2	2	1	1	1	0
204	2	42	42	8	22	2	1	0	1	8.6	2	1	2	2	0	0	0	0	0
205	2	32	32	5	20	1	0	0	1	8.5	1	1	0	2	1	1	1	1	0
206	2	34	34	10	22	3	0	0	1	9.1	1	1	1	1	0	0	0	0	0
207	2	42	41	2	20.3	1	2	0	1	9.2	1	1	1	2	0	0	0	0	0
208	2	37	37	8	20.8	3	0	0	1	8.9	2	1	2	1	0	0	0	0	0
209	2	30	30	2	23.4	1	0	0	1	11.7	2	1	2	1	0	0	0	0	0
210	2	39	39	11	22.9	2	1	0	1	10.2	2	1	1	1	0	0	0	0	0
211	2	29	29	5	21.1	3	1	0	1	10.4	2	1	0	2	1	1	1	0	1
212	2	27	27	5	27.7	2	0	0	2	9.3	2	1	0	2	0	0	0	0	0
213	2	37	36	3	23.5	1	6	1	1	7.1	2	1	2	2	1	1	1	1	0
214	2	40	40	10	21.1	2	0	0	1	8.3	2	1	2	2	0	0	0	0	0
215	2	36	35	2	21.5	2	1	0	1	7.1	2	1	2	2	0	0	0	0	0
216	2	33	33	2	21.1	3	0	0	1	9.8	2	1	2	2	1	1	1	1	0
217	2	31	31	4	19.9	1	0	0	1	8.9	1	1	0	1	1	1	1	1	0
218	2	28	28	1	20.3	3	2	0	1	8.7	1	1	1	2	0	0	0	0	0
219	2	29	29	1	19.1	3	0	0	1	8.2	2	1	2	2	2	1	1	1	0
220	2	29	29	4	22.9	1	1	0	1	9.2	2	1	2	2	0	0	0	0	0
221	2	40	36	7	30.8	3	1	0	1	7.1	2	1	2	2	0	0	0	0	0
222	2	28	23	8	18.8	3	2	1	1	8.3	2	1	1	2	2	1	1	1	0
223	2	30	30	11	25.7	2	0	0	2	7.3	1	1	1	2	0	0	0	0	0
224	2	34	34	2	20.2	2	0	0	1	8.8	1	1	1	1	0	0	0	0	0
225	2	32	32	5	22	1	0	0	1	12.8	1	1	1	1	1	1	1	1	0
226	2	34	34	1	23.8	1	7	1	1	9.2	1	1	1	2	1	1	1	1	0
227	2	30	30	3	19.1	2	0	0	2	10.1	2	1	1	2	0	0	0	0	0
228	2	41	41	2	26.3	4	3	1	1	10	2	1	2	2	0	0	0	0	0
229	2	24	24	2	25.9	1	0	0	2	9	2	1	2	1	0	0	0	0	0
230	2	40	40	2	22.2	2	1	0	2	9.2	2	1	0	2	0	0	0	0	0
231	2	29	29	3	25.6	1	0	0	2	8.4	2	1	2	2	1	1	1	1	0
232	2	33	32	3	23.4	2	0	0	1	8.6	2	1	0	1	0	0	0	0	0
233	2	24	24	3	20.5	1	0	0	2	8.1	2	1	2	2	1	1	1	1	0
234	2	30	30	2	20.1	1	0	0	1	9.6	2	1	2	1	1	1	1	1	0
235	2	32	32	5	21.1	1	2	0	1	7.2	2	1	0	2	2	1	1	0	1
236	2	30	30	3	24.6	3	0	0	1	10.9	2	1	0	1	0	0	0	0	0
237	2	35	34	6	23.4	1	0	0	1	9.2	2	1	2	2	2	1	1	1	0
238	2	31	30	3	24.7	1	0	0	1	8.7	2	1	2	2	2	1	1	1	0
239	2	28	28	2	18	3	0	0	1	9.5	1	1	1	2	0	0	0	0	0
240	2	35	34	4	23.4	3	0	0	1	8	2	1	2	1	1	1	1	1	0
241	2	34	34	5	21.5	3	0	0	1	12.2	2	1	1	1	1	1	1	1	0
242	2	31	31	5	22.2	1	0	0	1	9.3	1	1	1	2	0	0	0	0	0
243	2	38	38	6	22.8	2	1	0	1	8.4	2	1	1	2	1	1	1	0	1
244	2	32	32	7	17.9	3	0	0	1	8	2	1	1	1	1	1	1	1	0
245	2	33	33	5	22.5	1	0	0	1	8.7	1	1	1	1	1	1	1	1	0
246	2	33	33	5	20.4	3	0	0	1	9.3	1	2	1	2	0	0	0	0	0
247	2	33	33	8	20.3	2	0	0	2	13.9	2	1	0	1	0	1	0	0	0	.
248	2	34	34	3	23.4	3	1	0	1	9.1	2	1	1	1	2	1	1	1	0
249	2	34	34	3	22.6	1	0	0	1	10	2	1	2	1	0	0	0	0	0
250	2	27	27	2	17	1	0	0	1	12.7	2	1	1	1	0	0	0	0	0
251	2	30	30	2	22.6	1	1	0	1	8.5	2	1	1	1	2	1	1	1	0
252	2	30	30	6	22.3	4	0	0	1	9.6	2	1	2	2	2	1	1	1	0
253	2	31	31	4	22.8	1	0	0	1	10.2	2	1	1	1	1	1	1	1	0
254	2	30	30	6	15.1	1	1	0	1	7.6	2	1	2	2	1	1	1	1	0
255	2	33	32	2	22.3	1	0	0	1	8.6	2	1	1	2	1	1	1	1	0
256	2	35	35	3	20.6	2	0	0	1	11.1	2	1	2	1	1	1	1	1	0
257	2	32	32	6	21.3	1	0	0	1	12.1	2	1	1	1	0	0	0	0	0
258	2	36	36	4	20.2	2	0	0	1	8.6	2	1	2	1	0	0	0	0	0
259	2	29	27	10	24.5	1	1	0	2	8.1	2	1	2	2	1	1	1	1	0
260	2	32	32	4	24.8	1	0	0	1	9	2	1	2	2	1	1	1	1	0
261	2	31	29	6	23.4	2	2	1	1	9.2	2	1	2	1	1	1	1	1	0
262	2	25	25	4	21.5	4	0	0	1	8	1	1	1	2	1	1	1	1	0
263	2	30	30	1	19.6	1	0	0	1	9	1	1	1	2	0	1	0	0	0
264	2	32	32	3	21.6	1	5	1	1	8.6	2	1	0	1	1	1	1	1	0
265	2	31	31	1	25	3	0	0	1	7.9	1	2	1	1	1	1	1	1	0
266	2	31	30	6	21.6	1	0	0	1	8.4	2	1	1	2	1	1	1	1	0
267	2	32	32	3	20.1	1	2	0	1	8.3	2	1	2	2	0	0	0	0	0
268	2	33	33	10	19.5	1	1	0	1	7.5	2	1	0	2	0	0	0	0	0
269	2	33	33	8	20.8	3	0	0	2	8.1	2	1	0	2	1	1	1	0	0
270	2	32	32	3	16.6	1	0	0	1	8.4	2	1	1	2	1	1	1	1	0
271	2	34	34	10	21	1	0	0	1	9.8	2	1	1	2	0	0	0	0	0
272	2	33	33	3	24.1	1	1	0	2	8.9	2	1	0	2	1	1	1	1	0
273	2	34	34	3	22.9	1	0	0	1	7.7	2	1	1	1	1	1	1	0	1
274	2	36	33	8	20.8	3	4	1	1	10.9	2	1	2	1	2	1	1	1	0
275	2	34	34	10	22.2	1	0	0	1	11.3	1	1	0	1	1	1	1	0	1
276	2	37	36	2	23.1	1	1	0	1	7.6	2	1	1	2	1	1	1	1	0
277	2	27	26	4	28.2	3	0	0	1	8.7	2	1	0	1	0	0	0	0	0
278	2	31	31	2	21.5	2	0	0	2	7.6	1	1	0	2	0	0	0	0	0
279	2	38	36	11	22	3	4	2	1	10.2	2	2	2	2	1	1	1	1	0
280	2	33	33	4	21.6	4	0	0	1	8.8	2	1	1	2	0	1	0	0	0
281	2	34	34	1	25.4	3	0	0	1	10.7	2	1	1	2	1	1	1	0	0
282	2	34	34	12	18.9	1	1	1	2	8.6	2	1	1	2	0	0	0	0	0
283	2	33	33	2	23.6	1	1	0	2	8.5	2	1	0	2	0	0	0	0	0
284	2	31	31	5	22.5	4	0	0	2	8.1	2	1	2	2	0	0	0	0	0
285	2	32	32	4	18.4	1	0	0	1	7.7	2	1	2	2	2	1	1	1	0
286	2	28	28	2	18.9	1	1	0	1	9.7	2	1	1	1	0	0	0	0	0
287	2	24	24	4	22.6	3	0	0	1	8.3	2	1	0	1	2	1	1	1	0
288	2	37	36	6	20.6	3	0	0	1	9.3	2	1	0	1	0	0	0	0	0
289	2	35	34	6	23.7	2	0	0	1	8.5	2	2	2	2	0	0	0	0	0
290	2	40	40	9	30.7	3	0	0	1	9.4	2	1	1	2	0	1	0	0	0
291	2	29	29	4	22.2	3	0	0	1	7.7	2	1	1	2	1	1	0	0	0
292	2	34	34	5	20	1	0	0	1	11.8	1	2	1	1	0	0	0	0	0
293	2	36	36	7	23.8	3	1	0	1	8.8	2	1	2	2	2	1	1	1	0
294	2	31	31	4	19.8	1	0	0	1	9.4	2	1	1	1	1	1	1	0	1
295	2	31	31	1	24.5	3	1	0	1	10	1	1	1	1	0	0	0	0	0
296	2	33	33	2	19.7	3	0	0	1	12	2	1	0	1	2	1	1	1	0
297	2	35	34	5	21.9	2	0	0	1	6.9	2	1	1	2	1	1	1	1	0
298	2	27	27	2	18.8	1	0	0	1	8.2	2	1	0	1	1	1	1	1	0
299	2	33	33	5	24	1	0	0	1	10.1	2	1	2	2	1	1	1	1	0
300	2	31	31	2	19.1	1	1	0	1	12.8	2	1	2	1	1	1	1	1	0
301	2	25	25	2	26	1	1	0	1	11	2	1	2	1	0	0	0	0	0
302	2	40	40	11	22	3	1	1	1	8.2	2	1	2	1	0	1	0	0	0
303	2	35	35	3	25.7	3	0	0	1	9.8	2	1	1	2	2	1	1	1	0
304	2	29	29	2	22.4	4	0	0	2	11.3	2	1	0	2	1	1	1	1	0
305	2	32	32	7	20.6	1	0	0	1	10.2	2	1	1	1	0	0	0	0	0
306	2	36	36	1	26.4	3	0	0	1	9.5	2	1	0	1	0	0	0	0	0
307	2	32	32	6	19.5	3	0	0	1	14.6	2	1	2	2	1	1	1	0	1
308	2	33	32	6	21.2	3	0	0	1	10.1	2	1	1	1	0	0	0	0	0
309	2	32	28	14	25	3	3	1	1	8.2	2	1	0	2	2	1	1	1	0
310	2	32	31	9	21.2	3	2	1	1	9.9	2	1	2	2	1	1	1	1	0
311	2	29	29	3	20.8	3	3	1	1	10	1	1	1	2	1	1	1	1	0
312	2	30	30	3	26.7	1	0	0	1	8.5	2	1	2	1	2	1	1	1	0
313	2	26	26	5	20.7	3	0	0	2	8.8	2	1	2	2	2	1	1	1	0
314	2	33	32	2	20.1	3	0	0	1	9.4	2	1	0	1	0	0	0	0	0
315	2	30	30	6	19.5	1	0	0	1	13.5	2	1	2	1	0	0	0	0	0
316	2	37	37	3	21.8	1	0	0	1	6.5	2	1	2	2	2	1	1	1	0
317	2	32	32	1	23.3	3	2	1	1	8.3	2	1	2	2	2	1	1	1	0
318	2	39	39	7	21.9	1	2	1	1	8.8	1	2	0	2	1	1	1	1	0
319	2	38	38	5	19.5	4	1	1	1	7.1	1	1	1	2	1	1	1	1	0
320	2	37	37	3	22.7	1	3	0	1	9.2	2	1	1	2	1	1	1	0	1
321	2	26	25	3	24.4	1	0	0	1	9.1	2	1	1	2	0	0	0	0	0
322	2	32	32	1	20.5	1	1	0	1	8	1	2	0	2	0	0	0	0	0
323	2	35	34	3	21.4	3	0	0	1	12.3	2	1	2	2	2	1	1	1	0
324	2	37	37	1	23.1	1	3	0	1	8.8	2	1	2	1	0	0	0	0	0
325	2	31	31	7	21.3	1	0	0	1	8.6	2	1	1	2	2	1	1	1	0
326	2	31	31	4	20	3	0	0	1	10.1	1	1	1	2	1	1	1	1	0
327	2	36	35	5	26	1	0	0	1	8.9	2	1	2	2	2	1	1	0	1
